# Supplementary material for: Yeast cell route: a green and facile strategy for biosynthesis of carbonate nanoparticles
Source: Royal Society of Chemistry journal article supplement (doi:10.1039/d1ce00592h), 2021-01-01
Supplement: d1ce00592h1.pdf [file d1ce00592h1.pdf]

## Supporting information

### **Yeast Cell Route: A Green and Facile Strategy for Biosynthesis of Carbonate Nanoparticles**

**Yi Chang, Shuting Chen, Tingting Liu, Peng Liu, Yuming Guo, Lin Yang and Xiaoming Ma\***

*a. Key Laboratory of Green Chemical Media and Reactions, Ministry of Education, School of Chemistry and Chemical Engineering, Henan Normal University, Xinxiang, Henan 453007, P. R. China*

*b. Collaborative Innovation Center of Henan Province for Green Manufacturing of Fine Chemicals,*

*\* To whom correspondence should be addressed. e-mail: mxm@htu.edu.cn*

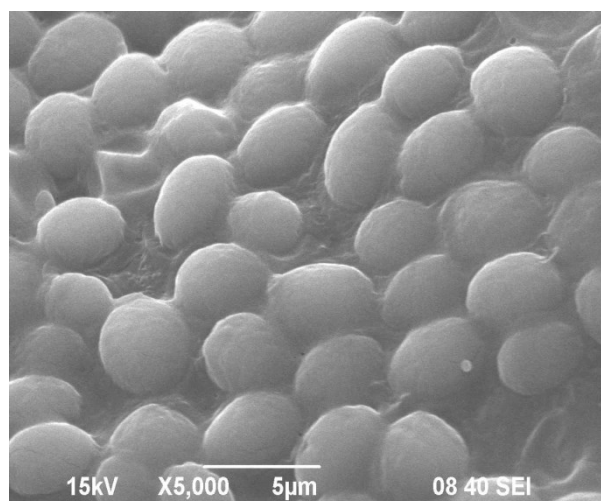

**Fig. S1** SEM image of the native yeast cells.

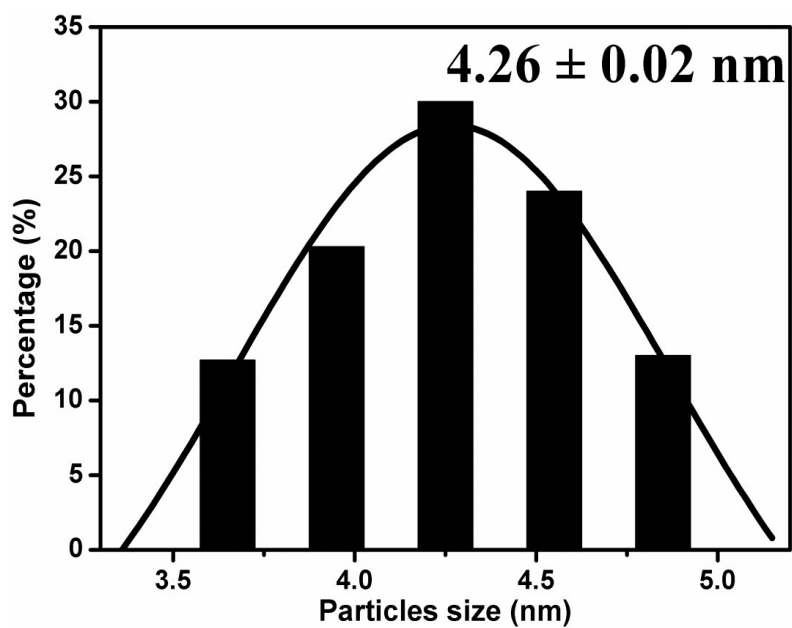

**Fig. S2** The particle size histograms recorded from representative isolated BaCO<sub>3</sub> nanoparticles.

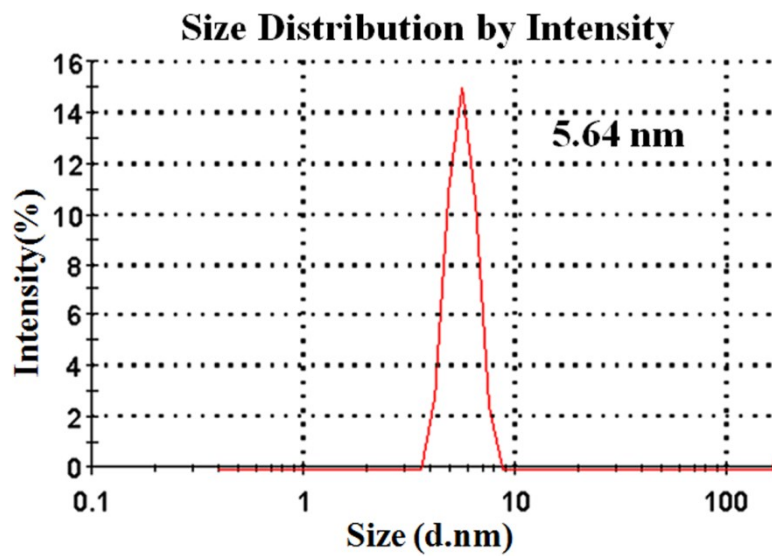

Fig. S3 DLS size distribution of isolated BaCO<sub>3</sub> nanoparticles.

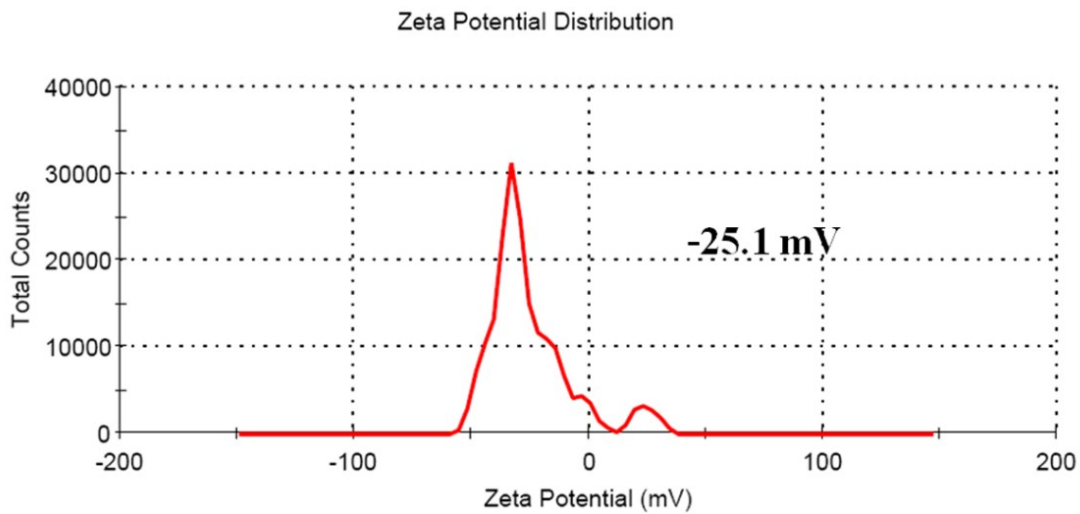

Fig. S4. Zeta potential of isolated BaCO<sub>3</sub> nanoparticles dispersion in PBS.

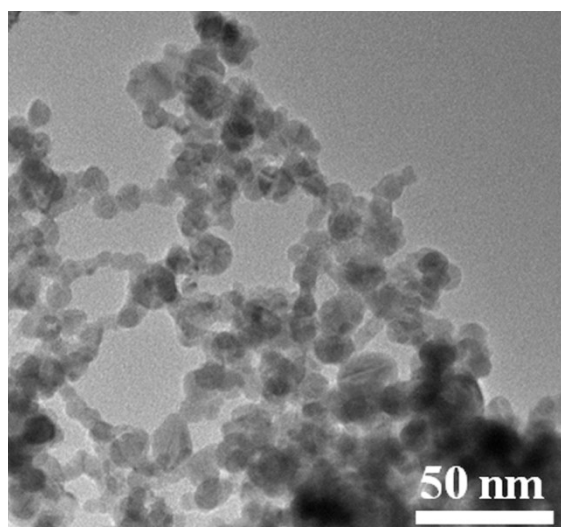

**Figure S5.** TEM micrographs of isolated nBaCO<sub>3</sub> prepared in the absence of cells.

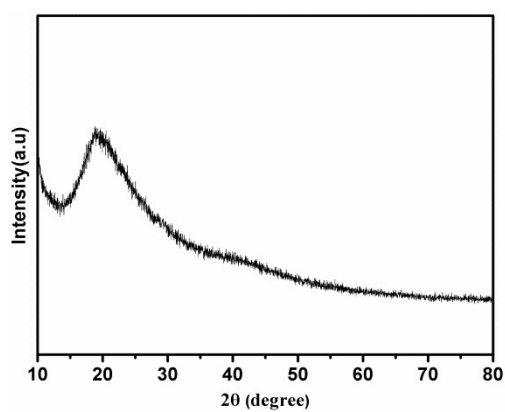

**Fig. S6.** XRD pattern of the whole yeast cells with intracellular nBaCO<sub>3</sub>.

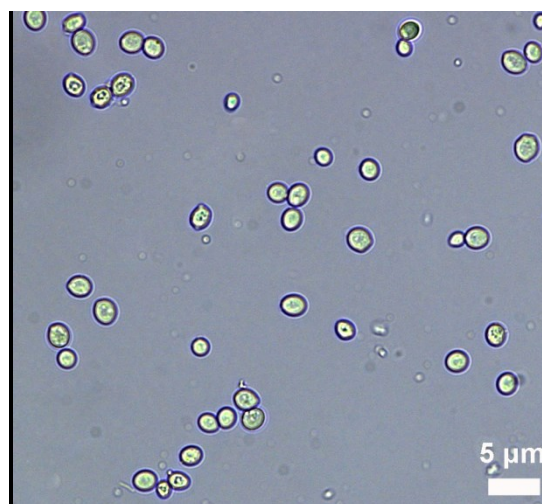

**Fig. S7.** Light micrograph of the control *S. cerevisiae* cells stained by trypan blue.
